# Supplementary material for: The Effects of Select Hydrocolloids on the Processing of Pâté-Style Canned Pet Food
Source: MDPI journal article supplement (doi:10.3390/foods10102506), 2021-10-19
Supplement: s1 [file s1]

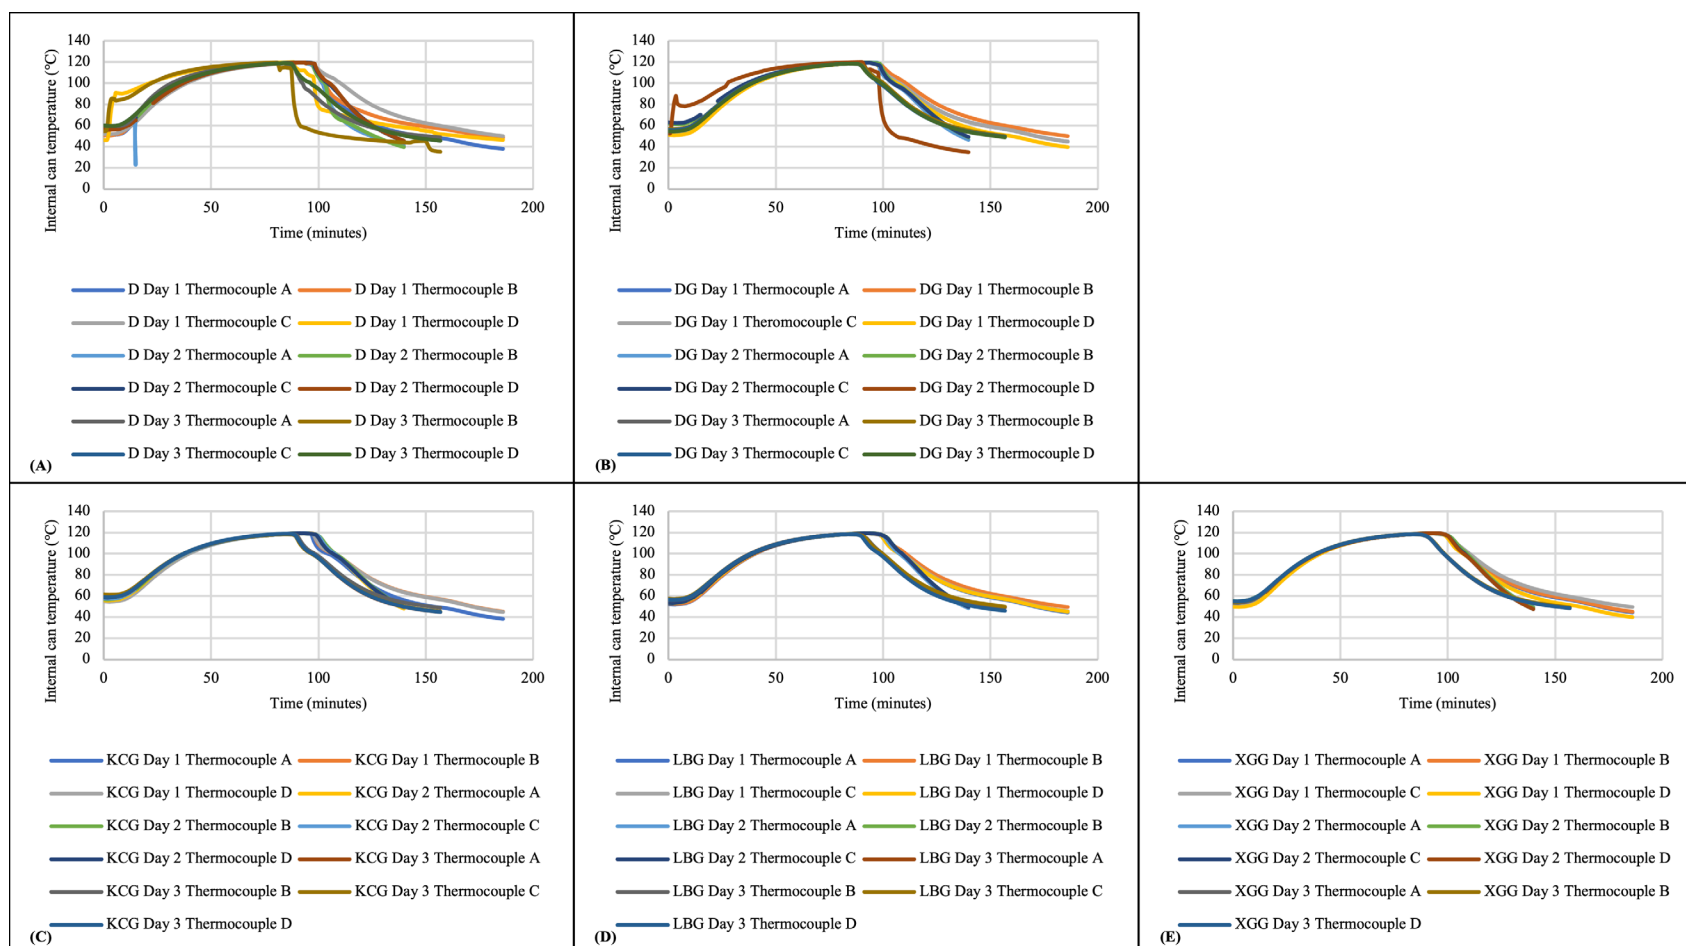

**Figure S1: Internal can temperatures during thermal processing for canned pet foods containing select hydrocolloids <sup>1</sup>.**

<sup>1</sup> D = 1% dextrose; DG = 0.5% guar gum and 0.5% dextrose; KCG = 0.5% guar gum and 0.5% kappa carrageenan; LBG = 0.5% guar gum and 0.5% locust bean gum; XGG = 0.5% guar gum and 0.5% xanthan gum.

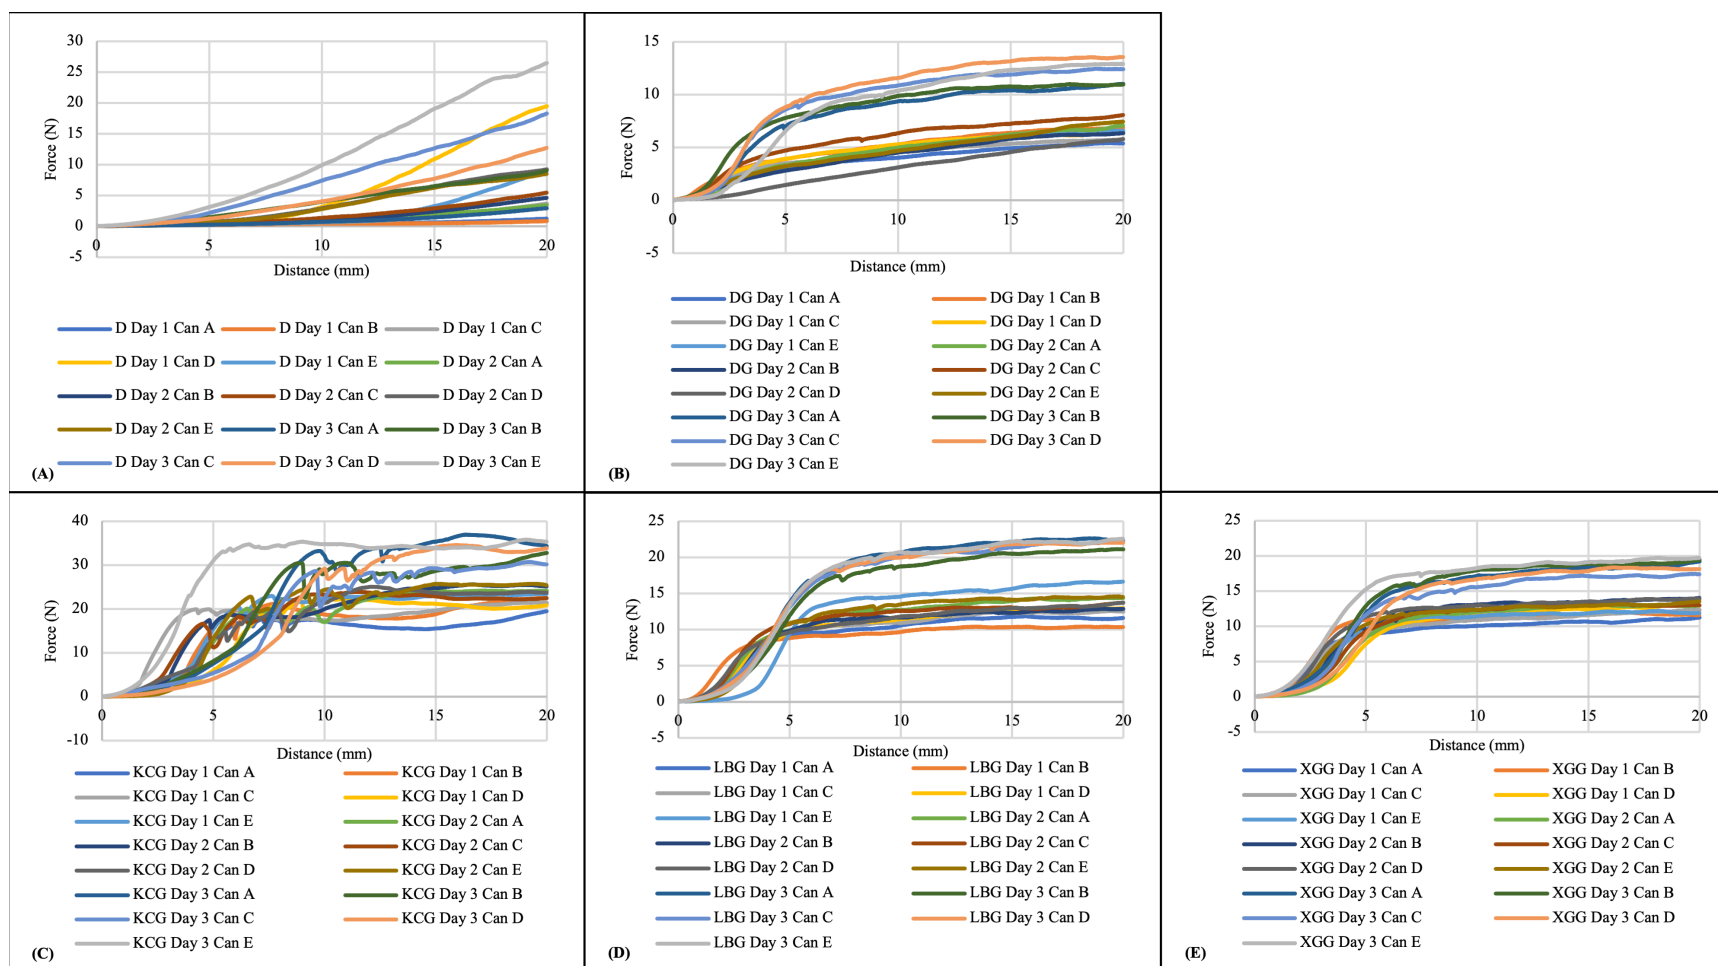

**Figure S2: Force deformation curves from modified back extrusion procedure applied to thermally processed canned pet foods containing select hydrocolloids<sup>1</sup>.**

<sup>1</sup> D = 1 % dextrose; DG = 0.5% guar gum and 0.5% dextrose; KCG = 0.5% guar gum and 0.5% kappa carrageenan; LBG = 0.5% guar gum and 0.5% locust bean gum; XGG = 0.5% guar gum and 0.5% xanthan gum.
